# Supplementary material for: Degradation of Polystyrene Nanoplastics in UV/NaClO and UV/PMS Systems: Insights into Degradation Efficiency, Mechanism, and Toxicity Evaluation
Source: MDPI journal article supplement (doi:10.3390/w15101920), 2023-05-18
Supplement: s1 [file s1]

## Supporting Information

for

# Degradation of Polystyrene Nanoplastics in UV/NaClO and UV/PMS Systems: Insights into Degradation Efficiency, Mechanism, and Toxicity Evaluation

Yishu Cai <sup>1,2</sup>, Fan Chen <sup>1,2</sup>, Lingfang Yang <sup>1,2</sup>, Lin Deng <sup>1,2,\*</sup> and Zhou Shi <sup>1,2,\*</sup>

1 Hunan Engineering Research Center of Water Security Technology and Application, College of Civil Engineering, Hunan University, Changsha 410082, China

2 b. Key Laboratory of Building Safety and Energy Efficiency, Ministry of Education, College of Civil Engineering, Hunan University, Changsha 410082, China

\* Correspondence: lindeng@hnu.edu.cn (L.D.); shiz61@hnu.edu.cn (Z.S.)

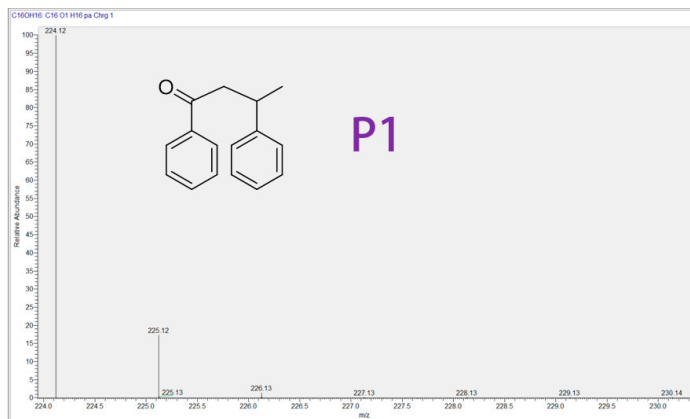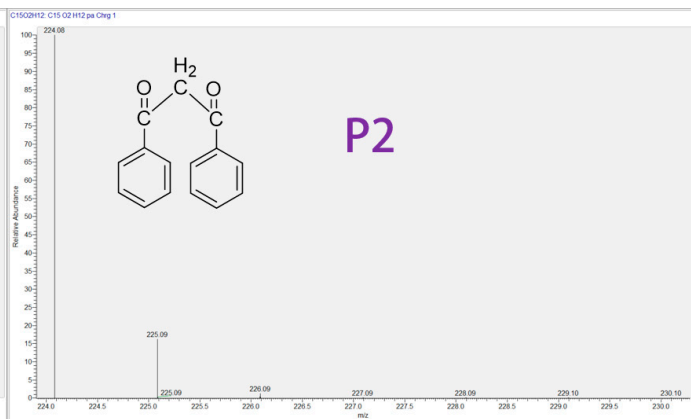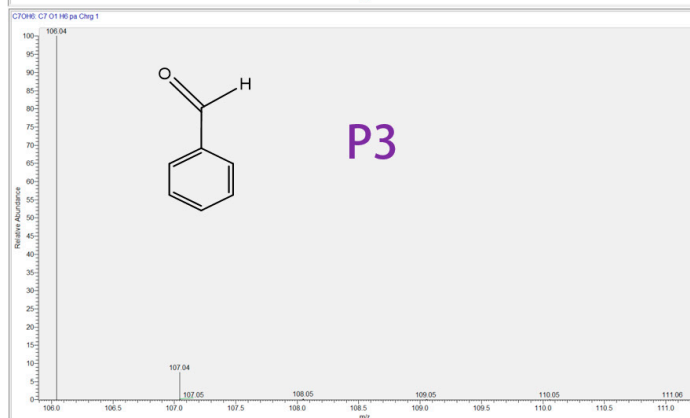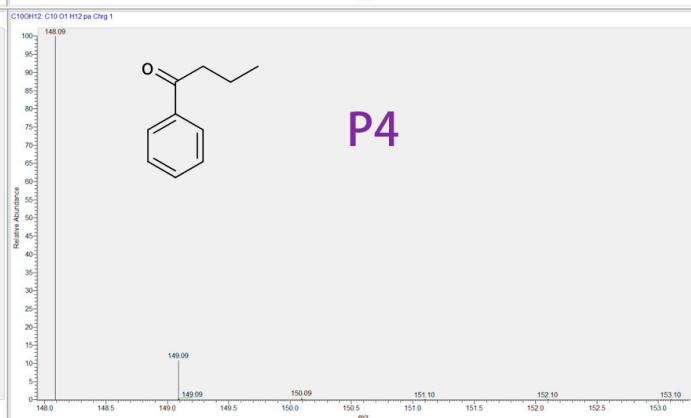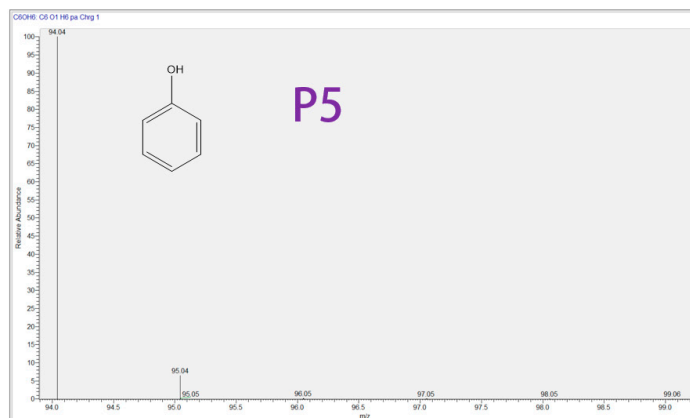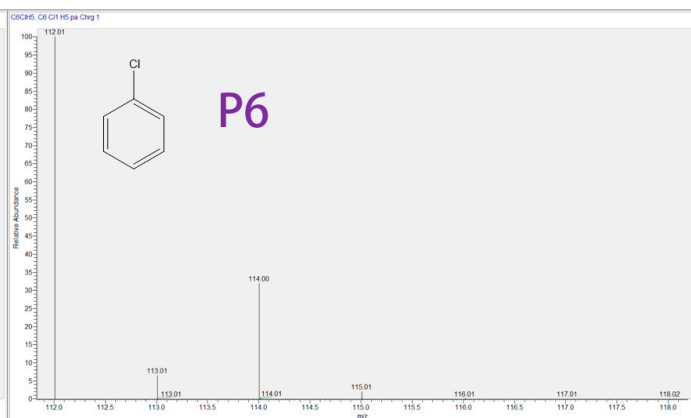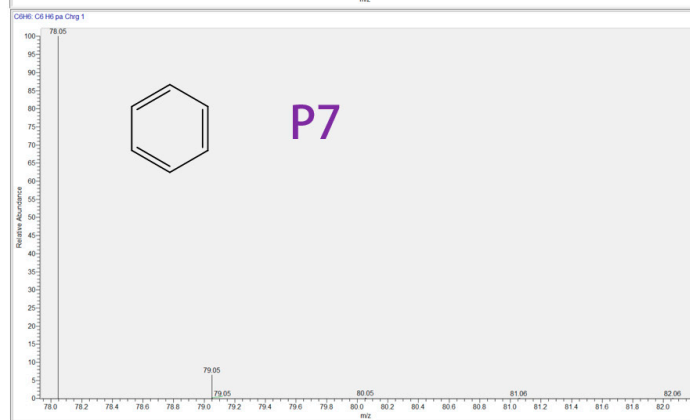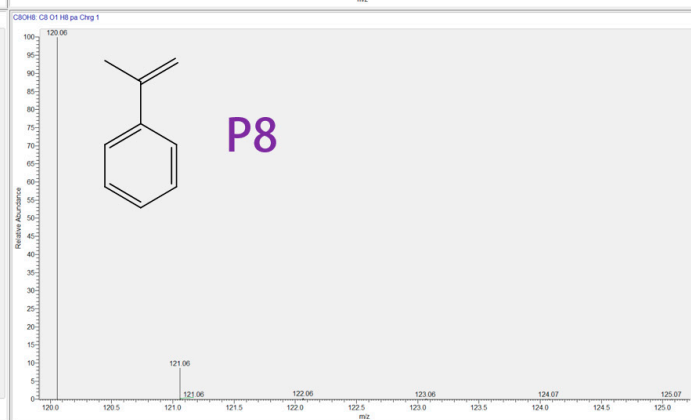

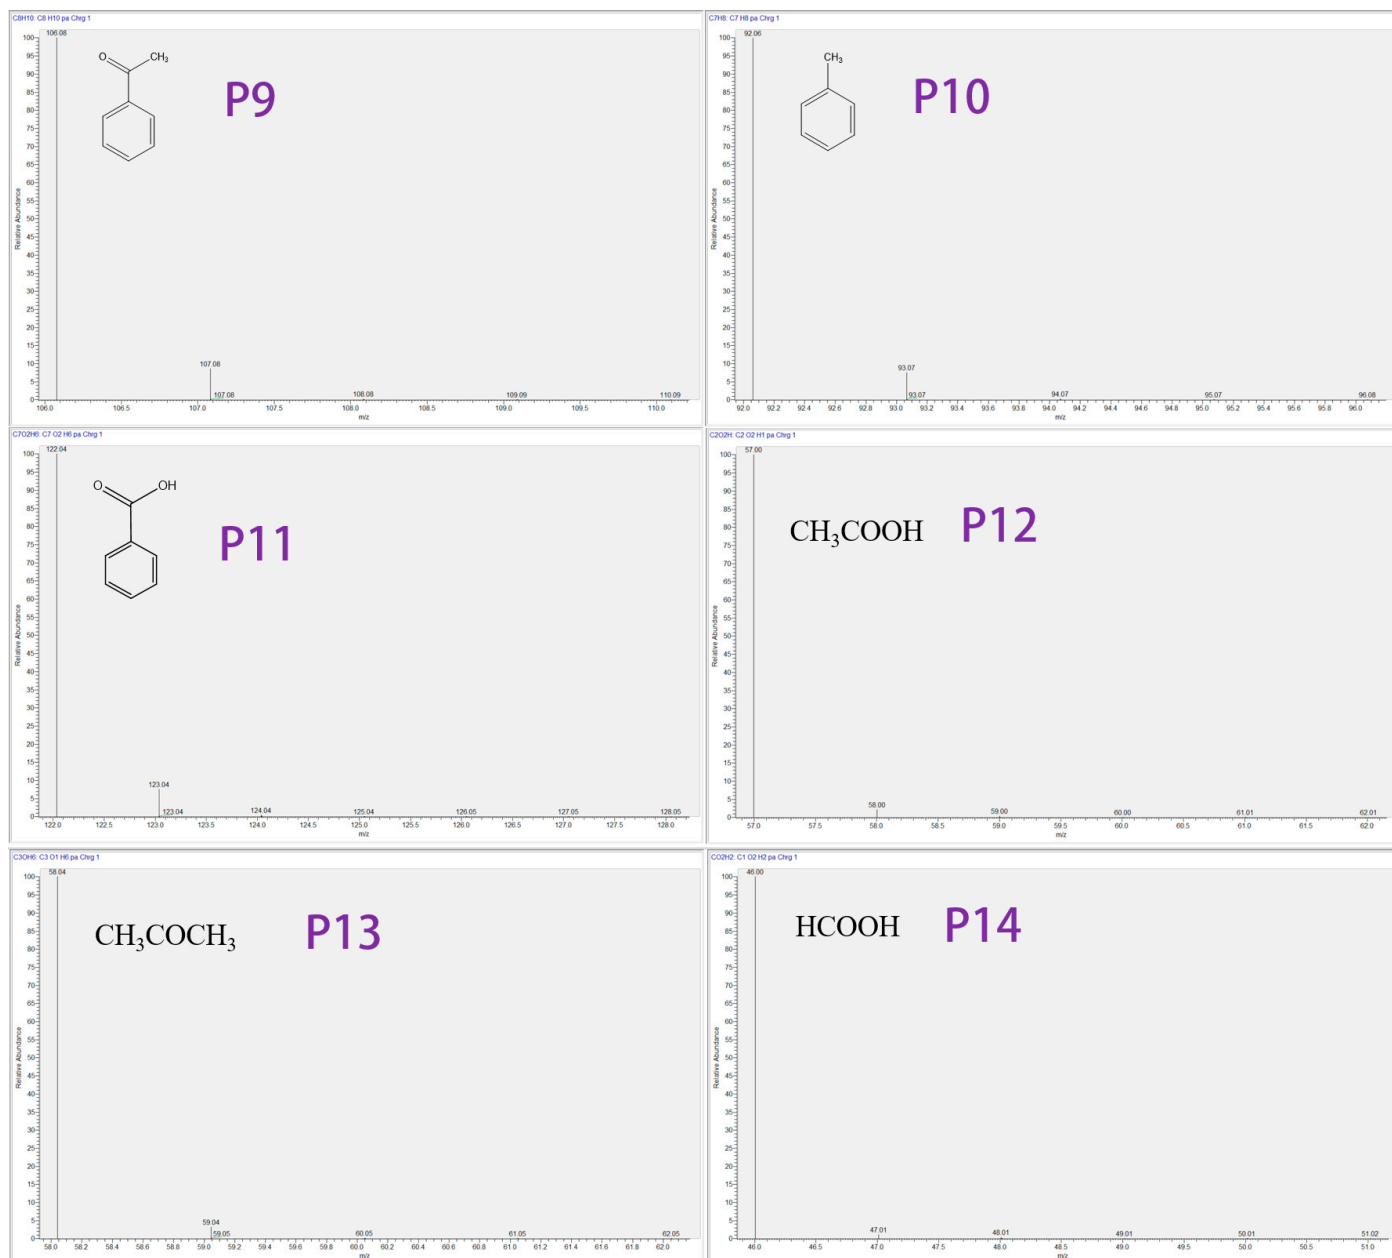

**Figure S1.** Mass spectrum of PS-NP and its degradation intermediates.
