# Supplementary material for: Degradation of Polystyrene Nanoplastics in UV/NaClO and UV/PMS Systems: Insights into Degradation Efficiency, Mechanism, and Toxicity Evaluation
Source: MDPI journal article supplement (doi:10.3390/w15101920), 2023-05-18
Supplement: s1 [file s1]

Archive with 1 entries (1 files):
- water-2379085-supplementary.pdf
